# Supplementary material for: Mechanistic insight into the N2O + O(1D,3P) reaction: role of post-CCSD(T) corrections and non-adiabatic effects
Source: Royal Society of Chemistry journal article supplement (doi:10.1039/d3cp03830k), 2023-01-01
Supplement: d3cp03830k1.pdf [file d3cp03830k1.pdf]

**Suplimentary Information for**  
**Mechanistic insight into  $\text{N}_2\text{O} + \text{O}(^1\text{D}, ^3\text{P})$  reaction:**  
**Role of post-CCSD(T) corrections and**  
**non-adiabatic effects.**

Vishva Jeet Anand and Pradeep Kumar\*

*Department of Chemistry, Malaviya National Institute of Technology Jaipur, Jaipur,  
302017, India*

E-mail: pradeep.chy@mnit.ac.in

**Sl. No.****Contents**

1. **Table S1:** Optimized geometries in Cartesian coordinates and all normal mode frequencies calculated at the CCSD(T)/aug-cc-pVTZ level of theory.
2. **Table S2:** Bimolecular rate constant ( $\text{cm}^3 \text{ molecule}^{-1} \text{ sec}^{-1}$ ) for  $\text{N}_2\text{O}+\text{O}(^1\text{D})$  reaction channel proceeds through TS1, TS2 and TS3 within the temperature range of 100K - 500K.
3. **Table S3:** Bimolecular rate constant ( $\text{cm}^3 \text{ molecule}^{-1} \text{ sec}^{-1}$ ) for  $\text{N}_2\text{O}+\text{O}(^3\text{P})$  reaction channel proceeds through MECP-1, and TS2-a within the temperature range of 700K - 4000K.
4. **Table S4:** The value of spin contamination of open shell atoms and molecules.
5. **Table S5:** Comparison in the frequency of CCSD/aug-cc-pVTZ with CCSD(T)/aug-cc-pVTZ level of theory.
6. **Figure S1:** Reaction scheme for  $\text{N}_2\text{O}+\text{O}(^1\text{D})$  reaction at CCSD(T)/aug-cc-pVTZ level of theory. The bond lengths are in Å.
7. **Figure S2:** Reaction scheme for  $\text{N}_2\text{O}+\text{O}(^3\text{P})$  reaction at CCSD(T)/aug-cc-pVTZ level of theory. The bond lengths are in Å
8. Formal derivation of  $\Delta E$ .

Table S1: Optimized geometries in Cartesian coordinates and normal mode frequencies of all species calculate at CCSD(T)/aug-cc-pVTZ level of theory

| compound          | Cartesian coordinates (Å) |           |           | frequency( $\text{cm}^{-1}$ ) |            |           |           |
|-------------------|---------------------------|-----------|-----------|-------------------------------|------------|-----------|-----------|
| N <sub>2</sub> O  | N                         | 0.0000    | 0.0000    | -0.072895                     | 593.2749   | 593.2773  | 1286.1339 |
|                   | N                         | 0.0000    | 0.0000    | -1.205426                     | 2266.8894  |           |           |
|                   | O                         | 0.0000    | 0.0000    | 1.11853                       |            |           |           |
| NO                | O                         | 0.0000    | 0.0000    | 0.53816                       | 2098.0374  |           |           |
|                   | N                         | 0.0000    | 0.0000    | -0.61504                      |            |           |           |
| N <sub>2</sub>    | N                         | 0.0000    | 0.0000    | 0.552                         | 2339.6874  |           |           |
|                   | N                         | 0.0000    | 0.0000    | -0.552                        |            |           |           |
| O <sub>2</sub> -S | O                         | 0.0000    | 0.0000    | 0.612753                      | 1474.5171  |           |           |
|                   | O                         | 0.0000    | 0.0000    | -0.612753                     |            |           |           |
| O <sub>2</sub> -T | O                         | 0.0000    | 0.0000    | 0.6067                        | 1573.4964  |           |           |
|                   | O                         | 0.0000    | 0.0000    | -0.6067                       |            |           |           |
| RC1               | N                         | -0.607729 | 0.147332  | -0.000046                     | 225.1180   | 497.7756  | 516.8776  |
|                   | N                         | -1.613986 | -0.345403 | 0.000024                      | 631.4689   | 1093.3805 | 2240.5577 |
|                   | O                         | 0.498196  | 0.696512  | 0.000019                      |            |           |           |
|                   | O                         | 1.445804  | -0.5232   | 0.0000                        |            |           |           |
| RC2               | N                         | -0.187124 | 0.084234  | -0.000676                     | 375.2516   | 571.4949  | 624.6608  |
|                   | O                         | -1.367057 | -0.08934  | 0.000269                      | 922.5401   | 1196.3174 | 1833.0425 |
|                   | N                         | 0.735207  | 0.917246  | 0.00022                       |            |           |           |
|                   | O                         | 0.887485  | -0.786955 | 0.00013                       |            |           |           |
| RC3               | N                         | 0.562181  | -0.231175 | -0.000124                     | 201.3204   | 364.7942  | 463.4955  |
|                   | N                         | -0.561965 | 0.23013   | -0.000125                     | 932.6954   | 1484.4237 | 1863.4079 |
|                   | O                         | 1.73901   | 0.065685  | 0.000109                      |            |           |           |
|                   | O                         | -1.7392   | -0.064771 | 0.000109                      |            |           |           |
| RC                | N                         | 0.832985  | -0.006389 | 0.000001                      | 52.2351    | 123.4813  | 592.8341  |
|                   | N                         | 1.084488  | -1.109629 | -0.000001                     | 654.7804   | 1373.4294 | 2796.7141 |
|                   | O                         | 0.568397  | 1.155073  | -0.000001                     |            |           |           |
|                   | O                         | -2.246186 | -0.178558 | 0.0000                        |            |           |           |
| TS1               | N                         | -0.680384 | 0.224335  | -0.003007                     | -946.2239  | 152.6449  | 206.5102  |
|                   | N                         | -1.647078 | -0.342608 | 0.001618                      | 656.4398   | 850.1829  | 2064.0769 |
|                   | O                         | 0.618475  | 0.634038  | 0.001477                      |            |           |           |
|                   | O                         | 1.418054  | -0.530549 | -0.000262                     |            |           |           |
| TS2               | N                         | 0.065646  | 0.083932  | 0.00004                       | -646.8003  | 538.0450  | 701.3230  |
|                   | N                         | -0.640369 | 1.100567  | -0.000014                     | 866.6304   | 1269.8212 | 1636.8551 |
|                   | O                         | 1.276391  | -0.09261  | -0.000014                     |            |           |           |
|                   | O                         | -0.773508 | -0.943827 | -0.00001                      |            |           |           |
| TS3               | N                         | 0.591616  | -0.309231 | -0.212938                     | -700.5640  | 289.9311  | 448.6233  |
|                   | N                         | -0.591632 | 0.300778  | -0.223121                     | 657.8640   | 1517.1072 | 1566.1905 |
|                   | O                         | 1.650127  | 0.099383  | 0.189177                      |            |           |           |
|                   | O                         | -1.650113 | -0.091987 | 0.192375                      |            |           |           |
| TS1-a             | O                         | -1.697673 | -0.356646 | -0.000783                     | -2051.9050 | 281.7750  | 293.9385  |
|                   | N                         | 0.615847  | -0.163573 | 0.00309                       | 681.0669   | 754.8209  | 1873.2989 |
|                   | O                         | -0.397507 | 0.646206  | -0.000195                     |            |           |           |
|                   | N                         | 1.778645  | -0.167353 | -0.001973                     |            |           |           |
| TS1-b             | N                         | 0.800445  | 0.346774  | 0.000099                      | -1222.2609 | 191.7602  | 364.4188  |
|                   | N                         | 1.522764  | -0.540558 | -0.000051                     | 610.1570   | 768.1695  | 1921.8375 |
|                   | O                         | -0.482501 | 0.69324   | -0.000063                     |            |           |           |
|                   | O                         | -1.550307 | -0.523678 | 0.000021                      |            |           |           |

| compound | Cartesian coordinates(Å) |           |           | frequency(cm <sup>-1</sup> ) |           |           |           |
|----------|--------------------------|-----------|-----------|------------------------------|-----------|-----------|-----------|
| TS2-a    | N                        | 0.514467  | 0.000976  | 0.000107                     | -925.0427 | 269.4177  | 457.7653  |
|          | N                        | -0.46482  | 0.667552  | -0.000029                    | 582.0238  | 1170.4971 | 1895.3758 |
|          | O                        | 1.688565  | -0.216949 | -0.000052                    |           |           |           |
|          | O                        | -1.732005 | -0.368012 | -0.000016                    |           |           |           |
| TS2-b    | N                        | -0.596981 | 0.372568  | 0.001035                     | -880.5666 | 236.2468  | 561.8708  |
|          | N                        | 0.522223  | 0.766115  | -0.000691                    | 641.5558  | 1211.2026 | 1868.8003 |
|          | O                        | -1.453515 | -0.456837 | -0.000442                    |           |           |           |
|          | O                        | 1.518928  | -0.539511 | 0.000141                     |           |           |           |
| MECP-1   | O                        | -0.164612 | -1.726339 | 0.0000                       | -262.6870 | 198.6914  | 616.9825  |
|          | N                        | 0         | 0.685439  | 0.0000                       | 634.2795  | 1292.5964 | 2427.0708 |
|          | O                        | 0.866617  | -0.138271 | 0.0000                       |           |           |           |
|          | N                        | -0.802291 | 1.445544  | 0.0000                       |           |           |           |
| MECP-2   | O                        | 0.894145  | 1.366037  | 0.0000                       | -389.5922 | 119.7845  | 622.7858  |
|          | O                        | -0.141514 | -1.817167 | 0.0000                       | 666.3199  | 1392.6795 | 2332.5978 |
|          | N                        | -0.86015  | -0.102453 | 0.0000                       |           |           |           |
|          | N                        | 0.0000    | 0.61803   | 0.0000                       |           |           |           |

Table S2: Bimolecular rate constant ( $\text{cm}^3 \text{ molecule}^{-1} \text{ sec}^{-1}$ ) for  $\text{N}_2\text{O}+\text{O}(^1\text{D})$  reaction channel proceeds through TS1, TS2 and TS3 within the temperature range of 100K - 500K.

| Temp.(K) | $k_{TS1}^{\text{N}_2+\text{O}_2}$ | $k_{TS2}^{\text{NO}+\text{NO}}$ | $k_{TS3}^{\text{NO}+\text{NO}}$ | $k_{TS2+TS3}^{\text{NO}+\text{NO}}$ | $k_{Total}$            | $k_{NO}/k_{\text{N}_2+\text{O}_2}$ | $k_{NO}/k_{Total}$ |
|----------|-----------------------------------|---------------------------------|---------------------------------|-------------------------------------|------------------------|------------------------------------|--------------------|
| 100      | $5.28 \times 10^{-11}$            | $7.58 \times 10^{-11}$          | $1.02 \times 10^{-11}$          | $8.60 \times 10^{-11}$              | $1.39 \times 10^{-10}$ | 1.63                               | 0.620              |
| 120      | $5.04 \times 10^{-11}$            | $7.21 \times 10^{-11}$          | $9.74 \times 10^{-12}$          | $8.18 \times 10^{-11}$              | $1.32 \times 10^{-10}$ | 1.62                               | 0.619              |
| 140      | $4.91 \times 10^{-11}$            | $6.99 \times 10^{-11}$          | $9.47 \times 10^{-12}$          | $7.93 \times 10^{-11}$              | $1.28 \times 10^{-10}$ | 1.62                               | 0.618              |
| 160      | $4.82 \times 10^{-11}$            | $6.85 \times 10^{-11}$          | $9.29 \times 10^{-12}$          | $7.78 \times 10^{-11}$              | $1.26 \times 10^{-10}$ | 1.61                               | 0.617              |
| 180      | $4.76 \times 10^{-11}$            | $6.75 \times 10^{-11}$          | $9.17 \times 10^{-12}$          | $7.67 \times 10^{-11}$              | $1.24 \times 10^{-10}$ | 1.61                               | 0.617              |
| 200      | $4.72 \times 10^{-11}$            | $6.68 \times 10^{-11}$          | $9.08 \times 10^{-12}$          | $7.59 \times 10^{-11}$              | $1.23 \times 10^{-10}$ | 1.61                               | 0.617              |
| 213      | $4.70 \times 10^{-11}$            | $6.65 \times 10^{-11}$          | $9.03 \times 10^{-12}$          | $7.55 \times 10^{-11}$              | $1.23 \times 10^{-10}$ | 1.61                               | 0.616              |
| 216      | $4.69 \times 10^{-11}$            | $6.64 \times 10^{-11}$          | $9.02 \times 10^{-12}$          | $7.54 \times 10^{-11}$              | $1.22 \times 10^{-10}$ | 1.61                               | 0.616              |
| 219      | $4.69 \times 10^{-11}$            | $6.64 \times 10^{-11}$          | $9.01 \times 10^{-12}$          | $7.54 \times 10^{-11}$              | $1.22 \times 10^{-10}$ | 1.61                               | 0.616              |
| 224      | $4.68 \times 10^{-11}$            | $6.63 \times 10^{-11}$          | $9.00 \times 10^{-12}$          | $7.53 \times 10^{-11}$              | $1.22 \times 10^{-10}$ | 1.61                               | 0.616              |
| 235      | $4.67 \times 10^{-11}$            | $6.60 \times 10^{-11}$          | $8.97 \times 10^{-12}$          | $7.50 \times 10^{-11}$              | $1.22 \times 10^{-10}$ | 1.61                               | 0.616              |
| 250      | $4.65 \times 10^{-11}$            | $6.58 \times 10^{-11}$          | $8.94 \times 10^{-12}$          | $7.47 \times 10^{-11}$              | $1.21 \times 10^{-10}$ | 1.61                               | 0.616              |
| 259      | $4.65 \times 10^{-11}$            | $6.57 \times 10^{-11}$          | $8.92 \times 10^{-12}$          | $7.46 \times 10^{-11}$              | $1.21 \times 10^{-10}$ | 1.61                               | 0.616              |
| 265      | $4.64 \times 10^{-11}$            | $6.56 \times 10^{-11}$          | $8.91 \times 10^{-12}$          | $7.45 \times 10^{-11}$              | $1.21 \times 10^{-10}$ | 1.61                               | 0.616              |
| 278      | $4.63 \times 10^{-11}$            | $6.54 \times 10^{-11}$          | $8.89 \times 10^{-12}$          | $7.43 \times 10^{-11}$              | $1.21 \times 10^{-10}$ | 1.60                               | 0.616              |
| 280      | $4.63 \times 10^{-11}$            | $6.54 \times 10^{-11}$          | $8.88 \times 10^{-12}$          | $7.43 \times 10^{-11}$              | $1.21 \times 10^{-10}$ | 1.60                               | 0.616              |
| 290      | $4.62 \times 10^{-11}$            | $6.53 \times 10^{-11}$          | $8.87 \times 10^{-12}$          | $7.42 \times 10^{-11}$              | $1.20 \times 10^{-10}$ | 1.60                               | 0.616              |
| 298      | $4.62 \times 10^{-11}$            | $6.53 \times 10^{-11}$          | $8.86 \times 10^{-12}$          | $7.41 \times 10^{-11}$              | $1.20 \times 10^{-10}$ | 1.60                               | 0.616              |
| 300      | $4.62 \times 10^{-11}$            | $6.52 \times 10^{-11}$          | $8.86 \times 10^{-12}$          | $7.41 \times 10^{-11}$              | $1.20 \times 10^{-10}$ | 1.60                               | 0.616              |
| 310      | $4.61 \times 10^{-11}$            | $6.52 \times 10^{-11}$          | $8.85 \times 10^{-12}$          | $7.40 \times 10^{-11}$              | $1.20 \times 10^{-10}$ | 1.60                               | 0.616              |
| 320      | $4.61 \times 10^{-11}$            | $6.51 \times 10^{-11}$          | $8.84 \times 10^{-12}$          | $7.39 \times 10^{-11}$              | $1.20 \times 10^{-10}$ | 1.60                               | 0.616              |
| 350      | $4.60 \times 10^{-11}$            | $6.49 \times 10^{-11}$          | $8.81 \times 10^{-12}$          | $7.37 \times 10^{-11}$              | $1.20 \times 10^{-10}$ | 1.60                               | 0.616              |
| 370      | $4.59 \times 10^{-11}$            | $6.48 \times 10^{-11}$          | $8.80 \times 10^{-12}$          | $7.36 \times 10^{-11}$              | $1.20 \times 10^{-10}$ | 1.60                               | 0.616              |
| 400      | $4.58 \times 10^{-11}$            | $6.47 \times 10^{-11}$          | $8.78 \times 10^{-12}$          | $7.34 \times 10^{-11}$              | $1.19 \times 10^{-10}$ | 1.60                               | 0.616              |
| 420      | $4.58 \times 10^{-11}$            | $6.46 \times 10^{-11}$          | $8.77 \times 10^{-12}$          | $7.34 \times 10^{-11}$              | $1.19 \times 10^{-10}$ | 1.60                               | 0.616              |
| 440      | $4.57 \times 10^{-11}$            | $6.45 \times 10^{-11}$          | $8.76 \times 10^{-12}$          | $7.33 \times 10^{-11}$              | $1.19 \times 10^{-10}$ | 1.60                               | 0.616              |
| 450      | $4.57 \times 10^{-11}$            | $6.45 \times 10^{-11}$          | $8.76 \times 10^{-12}$          | $7.33 \times 10^{-11}$              | $1.19 \times 10^{-10}$ | 1.60                               | 0.616              |
| 470      | $4.57 \times 10^{-11}$            | $6.45 \times 10^{-11}$          | $8.75 \times 10^{-12}$          | $7.32 \times 10^{-11}$              | $1.19 \times 10^{-10}$ | 1.60                               | 0.616              |
| 500      | $4.57 \times 10^{-11}$            | $6.44 \times 10^{-11}$          | $8.74 \times 10^{-12}$          | $7.31 \times 10^{-11}$              | $1.19 \times 10^{-10}$ | 1.60                               | 0.616              |

Table S3: Bimolecular rate constant ( $\text{cm}^3 \text{ molecule}^{-1} \text{ sec}^{-1}$ ) for  $\text{N}_2\text{O}+\text{O}(^3\text{P})$  reaction channel proceeds through MECP-1, TS2-b, TS2-a, and TS1-b within the temperature range of 700K - 4000K.

| Temp. (K) | MECP-1                 | TS2-b                  | TS2-a                  | TS1-b                  |
|-----------|------------------------|------------------------|------------------------|------------------------|
| 700       | $9.90 \times 10^{-17}$ | $5.39 \times 10^{-19}$ | $1.10 \times 10^{-20}$ | $4.11 \times 10^{-23}$ |
| 800       | $3.65 \times 10^{-16}$ | $5.38 \times 10^{-18}$ | $1.78 \times 10^{-19}$ | $1.50 \times 10^{-21}$ |
| 900       | $1.01 \times 10^{-15}$ | $3.28 \times 10^{-17}$ | $1.59 \times 10^{-18}$ | $2.52 \times 10^{-20}$ |
| 1000      | $2.31 \times 10^{-15}$ | $1.42 \times 10^{-16}$ | $9.26 \times 10^{-18}$ | $2.46 \times 10^{-19}$ |
| 1100      | $4.54 \times 10^{-15}$ | $4.74 \times 10^{-16}$ | $3.97 \times 10^{-17}$ | $1.61 \times 10^{-18}$ |
| 1200      | $8.00 \times 10^{-15}$ | $1.31 \times 10^{-15}$ | $1.35 \times 10^{-16}$ | $7.79 \times 10^{-18}$ |
| 1300      | $1.30 \times 10^{-14}$ | $3.11 \times 10^{-15}$ | $3.82 \times 10^{-16}$ | $2.99 \times 10^{-17}$ |
| 1400      | $1.97 \times 10^{-14}$ | $6.59 \times 10^{-15}$ | $9.41 \times 10^{-16}$ | $9.51 \times 10^{-17}$ |
| 1500      | $2.83 \times 10^{-14}$ | $1.27 \times 10^{-14}$ | $2.06 \times 10^{-15}$ | $2.61 \times 10^{-16}$ |
| 1600      | $3.90 \times 10^{-14}$ | $2.26 \times 10^{-14}$ | $4.13 \times 10^{-15}$ | $6.36 \times 10^{-16}$ |
| 1700      | $5.18 \times 10^{-14}$ | $3.79 \times 10^{-14}$ | $7.64 \times 10^{-15}$ | $1.40 \times 10^{-15}$ |
| 1800      | $6.68 \times 10^{-14}$ | $6.00 \times 10^{-14}$ | $1.32 \times 10^{-14}$ | $2.84 \times 10^{-15}$ |
| 1900      | $8.40 \times 10^{-14}$ | $9.10 \times 10^{-14}$ | $2.18 \times 10^{-14}$ | $5.35 \times 10^{-15}$ |
| 2000      | $1.03 \times 10^{-13}$ | $1.33 \times 10^{-13}$ | $3.41 \times 10^{-14}$ | $9.51 \times 10^{-15}$ |
| 2100      | $1.25 \times 10^{-13}$ | $1.87 \times 10^{-13}$ | $5.13 \times 10^{-14}$ | $1.60 \times 10^{-14}$ |
| 2200      | $1.48 \times 10^{-13}$ | $2.56 \times 10^{-13}$ | $7.47 \times 10^{-14}$ | $2.59 \times 10^{-14}$ |
| 2300      | $1.74 \times 10^{-13}$ | $3.43 \times 10^{-13}$ | $1.05 \times 10^{-13}$ | $4.01 \times 10^{-14}$ |
| 2400      | $2.01 \times 10^{-13}$ | $4.48 \times 10^{-13}$ | $1.45 \times 10^{-13}$ | $6.00 \times 10^{-14}$ |
| 2500      | $2.30 \times 10^{-13}$ | $5.73 \times 10^{-13}$ | $1.94 \times 10^{-13}$ | $8.72 \times 10^{-14}$ |
| 2600      | $2.61 \times 10^{-13}$ | $7.22 \times 10^{-13}$ | $2.55 \times 10^{-13}$ | $1.23 \times 10^{-13}$ |
| 2700      | $2.94 \times 10^{-13}$ | $8.95 \times 10^{-13}$ | $3.29 \times 10^{-13}$ | $1.70 \times 10^{-13}$ |
| 2800      | $3.28 \times 10^{-13}$ | $1.09 \times 10^{-12}$ | $4.17 \times 10^{-13}$ | $2.30 \times 10^{-13}$ |
| 2900      | $3.63 \times 10^{-13}$ | $1.32 \times 10^{-12}$ | $5.20 \times 10^{-13}$ | $3.05 \times 10^{-13}$ |
| 3000      | $4.00 \times 10^{-13}$ | $1.58 \times 10^{-12}$ | $6.41 \times 10^{-13}$ | $3.97 \times 10^{-13}$ |
| 3100      | $4.38 \times 10^{-13}$ | $1.86 \times 10^{-12}$ | $7.80 \times 10^{-13}$ | $5.08 \times 10^{-13}$ |
| 3200      | $4.77 \times 10^{-13}$ | $2.18 \times 10^{-12}$ | $9.39 \times 10^{-13}$ | $6.42 \times 10^{-13}$ |
| 3300      | $5.17 \times 10^{-13}$ | $2.53 \times 10^{-12}$ | $1.12 \times 10^{-12}$ | $8.01 \times 10^{-13}$ |
| 3400      | $5.58 \times 10^{-13}$ | $2.91 \times 10^{-12}$ | $1.32 \times 10^{-12}$ | $9.86 \times 10^{-13}$ |
| 3500      | $6.00 \times 10^{-13}$ | $3.33 \times 10^{-12}$ | $1.54 \times 10^{-12}$ | $1.20 \times 10^{-12}$ |
| 3600      | $6.42 \times 10^{-13}$ | $3.78 \times 10^{-12}$ | $1.79 \times 10^{-12}$ | $1.45 \times 10^{-12}$ |
| 3700      | $6.86 \times 10^{-13}$ | $4.27 \times 10^{-12}$ | $2.07 \times 10^{-12}$ | $1.73 \times 10^{-12}$ |
| 3800      | $7.30 \times 10^{-13}$ | $4.79 \times 10^{-12}$ | $2.36 \times 10^{-12}$ | $2.05 \times 10^{-12}$ |
| 3900      | $7.75 \times 10^{-13}$ | $5.35 \times 10^{-12}$ | $2.69 \times 10^{-12}$ | $2.41 \times 10^{-12}$ |
| 4000      | $8.20 \times 10^{-13}$ | $5.94 \times 10^{-12}$ | $3.04 \times 10^{-12}$ | $2.81 \times 10^{-12}$ |

Table S4: The value of spin contamination of open shell atoms and molecules.

| Species     | Spin contamination |
|-------------|--------------------|
| O ( $^3P$ ) | 0.0                |
| RC          | 0.0                |
| TS1-a       | 0.1433             |
| TS1-b       | 0.0840             |
| TS2-a       | 0.1331             |
| TS2-b       | 0.1261             |

Table S5: Comparison in the frequency of CCSD/aug-cc-pVTZ with CCSD(T)/aug-cc-pVTZ) level of theory.

| compound | frequency( $\text{cm}^{-1}$ ) CCSD/aug-cc-pVTZ |           |           | frequency( $\text{cm}^{-1}$ )CCSD(T)/aug-cc-pVTZ |           |           |
|----------|------------------------------------------------|-----------|-----------|--------------------------------------------------|-----------|-----------|
| RC-1     | 234.5165                                       | 532.8316  | 564.4742  | 225.118                                          | 497.7756  | 516.8776  |
|          | 640.0026                                       | 1110.5956 | 2355.6543 | 631.4689                                         | 1093.3805 | 2240.5577 |
| TS-1     | -988.7137                                      | 191.7216  | 235.7716  | -946.2239                                        | 152.6449  | 206.5102  |
|          | 657.4644                                       | 877.1877  | 2234.9795 | 656.4398                                         | 850.1829  | 2064.0769 |

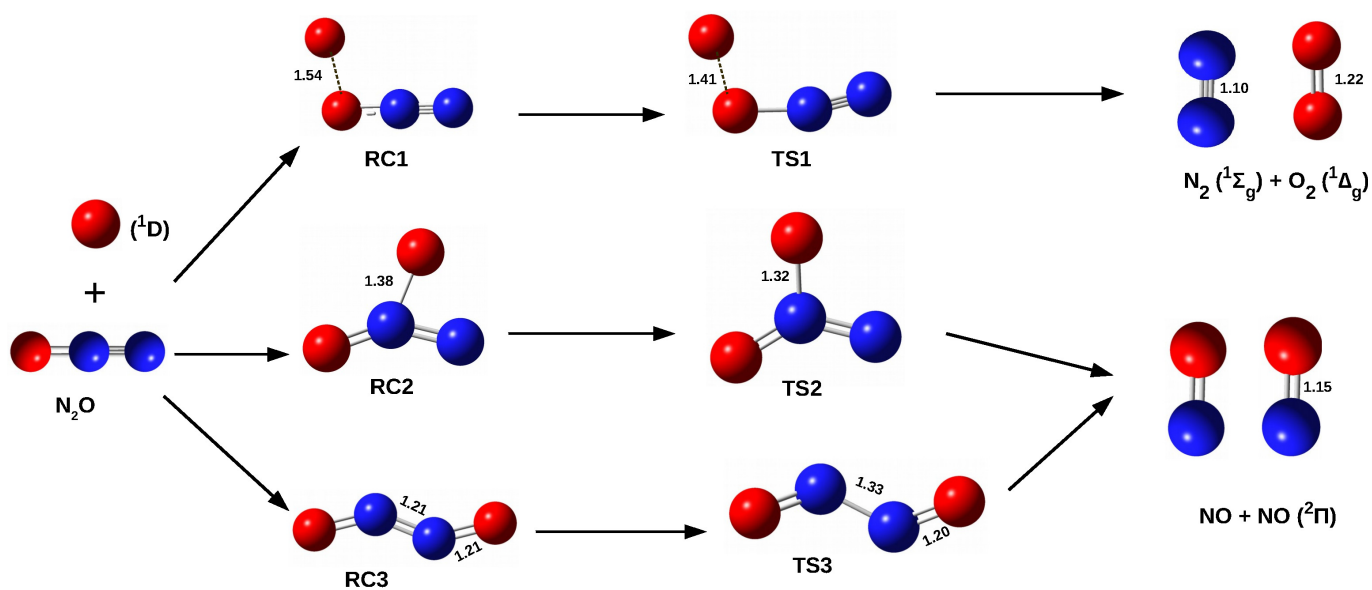

Figure S1: Reaction scheme for  $\text{N}_2\text{O} + \text{O}({}^1\text{D})$  reaction at CCSD(T)/aug-cc-pVTZ level of theory. The bond lengths are in Å.



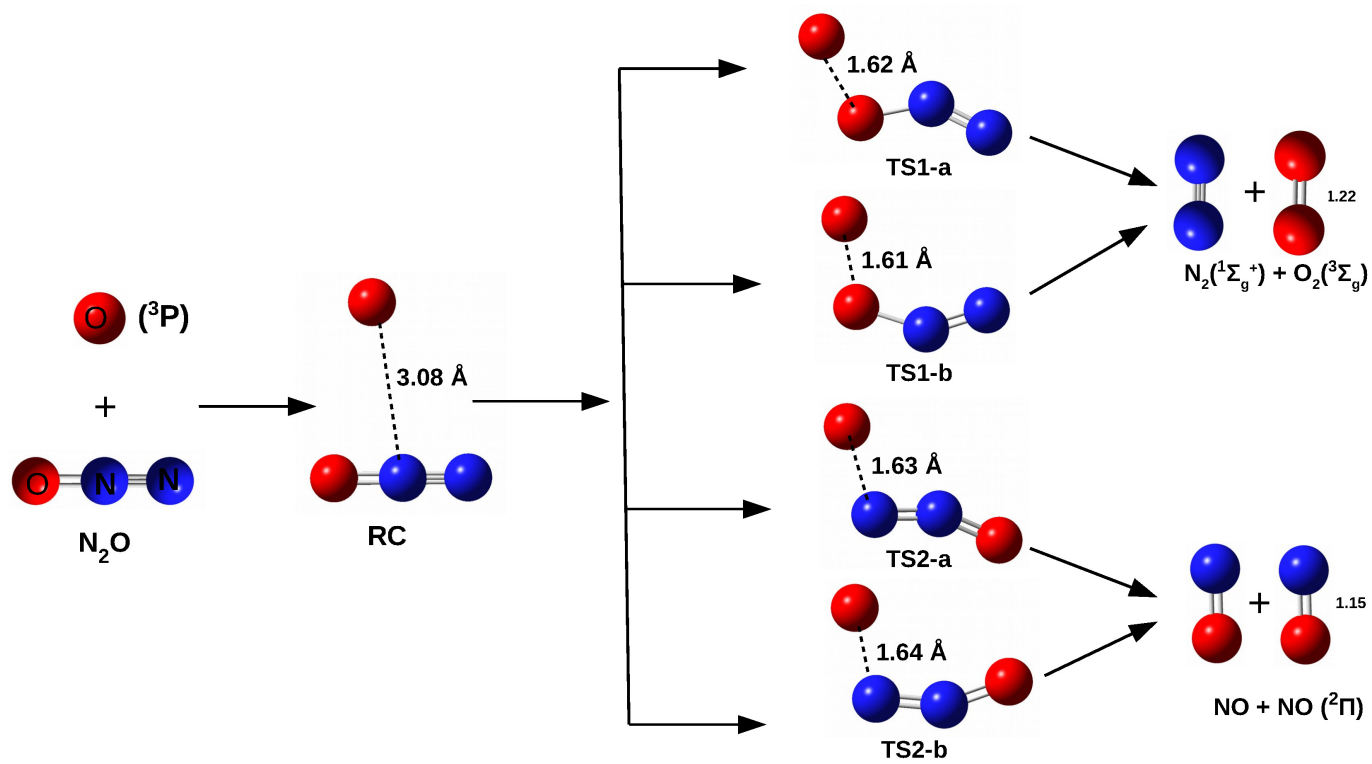

Figure S2: Reaction scheme for  $\text{N}_2\text{O} + \text{O}({}^3\text{P})$  reaction at CCSD(T)/aug-cc-pVTZ level of theory. The bond lengths are in  $\text{\AA}$

# 1 Formal derivation of $\Delta E$ .

Rate expression for  $N_2$  and  $NO$  production paths

$$k_{N_2} = A_1 e^{(-\beta E_1)} \quad (1)$$

$$k_{NO} = A_2 e^{(-\beta E_2)} \quad (2)$$

$$\text{Rate of } N_2 \text{ relative to the total reaction} = \frac{k_{N_2}}{k_{N_2} + k_{NO}}$$

$$= \left[ 1 + \frac{k_{NO}}{k_{N_2}} \right]^{-1} \quad (3)$$

Putting the value in equation (3) from (1) and (2)

$$= \left[ 1 + \frac{A_2 e^{(-\beta E_2)}}{A_1 e^{(-\beta E_1)}} \right]^{-1}$$

$$= \left[ 1 - \frac{A_2}{A_1} e^{-\beta(E_1 - E_2)} + \left(\frac{A_2}{A_1}\right)^2 e^{-2\beta(E_1 - E_2)} - \left(\frac{A_2}{A_1}\right)^3 e^{-3\beta(E_1 - E_2)} + \left(\frac{A_2}{A_1}\right)^4 e^{-4\beta(E_1 - E_2)} \right]$$

(Neglect higher order term)

$$= \left[ 1 - \frac{A_2}{A_1} e^{-\beta(\Delta E)} \right]$$
